1           Lactate production without hypoxia in skeletal muscle  
2           during electrical cycling: Crossover study of femoral  
3           venous-arterial differences in healthy volunteers.

4  
5   Jan Gojda<sup>1,2¶\*</sup>, Petr Waldauf<sup>1¶</sup>, Natália Hrušková<sup>3&</sup>, Barbora Blahutová<sup>3&</sup>, Adéla  
6   Krajčová<sup>1, 2&</sup>, Petr Tůma<sup>4&</sup>, Kamila Řasová<sup>3&</sup> and František Duška<sup>1¶</sup>

7  
8   <sup>1</sup> Department of Anaesthesia and Intensive Care Medicine, Kralovske Vinohrady  
9   University Hospital and The Third Faculty of Medicine, Charles University,  
10   Prague, Czech Republic

11  
12   <sup>2</sup> 2<sup>nd</sup> Department of Internal Medicine, Kralovske Vinohrady University Hospital  
13   and The Third Faculty of Medicine, Charles University, Prague, Czech Republic

14  
15   <sup>3</sup> Department of Rehabilitation, Kralovske Vinohrady University Hospital and  
16   The Third Faculty of Medicine, Charles University, Prague, Czech Republic

17  
18   <sup>4</sup> Department of Hygiene, The Third Faculty of Medicine, Charles University,  
19   Prague, Czech Republic

20  
21   JG and PW contributed equally and shall be considered joint first authors. FD is  
22   a senior author.

23  
24  
25   \* Corresponding author

26   jan.gojda@lf3.cuni.cz (JG)

27

28

29

30

## 31 **Abstract:**

### 32 **Background**

33 Aim of the study was to compare metabolic response of leg skeletal muscle during  
34 functional electrical stimulation-driven unloaded cycling (FES) to that seen during  
35 volitional supine cycling.

### 36 **Methods**

37 Fourteen healthy volunteers were exposed in random order to supine cycling, either  
38 volitional (10-25-50 W, 10 min) or FES assisted (unloaded, 10 min) in a crossover design.  
39 Whole body and leg muscle metabolism were assessed by indirect calorimetry with  
40 concomitant repeated measurements of femoral venous-arterial differences of blood gases,  
41 glucose, lactate and amino acids.

### 42 **Results**

43 Unloaded FES cycling, but not volitional exercise, led to a significant increase in across-  
44 leg lactate production (from  $-1.1 \pm 2.1$  to  $5.5 \pm 7.4$  mmol/min,  $p < 0.001$ ) and mild elevation of  
45 arterial lactate (from  $1.8 \pm 0.7$  to  $2.5 \pm 0.8$  mM). This occurred without widening of across-  
46 leg VA O<sub>2</sub> and CO<sub>2</sub> gaps. Femoral SvO<sub>2</sub> difference was directly proportional to VA  
47 difference of lactate ( $R^2 = 0.60$ ,  $p = 0.002$ ). Across-leg glucose uptake did not change with  
48 either type of exercise. Systemic oxygen consumption increased with FES cycling to  
49 similarly to 25W volitional exercise ( $138 \pm 29\%$  resp.  $124 \pm 23\%$  of baseline). There was a  
50 net uptake of branched-chain amino acids and net release of Alanine from skeletal muscle,  
51 which were unaltered by either type of exercise.

### 52 **Conclusions**

53 Unloaded FES cycling, but not volitional exercise causes significant lactate production  
54 without hypoxia in skeletal muscle. This phenomenon can be significant in vulnerable  
55 patients' groups.

56

## 57 **Introduction**

58 Functional electrical stimulation-assisted cycling (FES cycling) is a method  
59 originally developed over 30 years ago for patients with spinal cord injury [1]. It uses  
60 computer-driven electrical pulses delivered by transcutaneous electrodes and directly  
61 activating muscle contractions, independently on functionality of the physiological  
62 pathway between upper motoneuron and the neuromuscular junctions. The method is now  
63 commercially available in the form of both stationary and mobile devices [2], used by  
64 patients with a wide range of conditions incl. spinal cord injury [3], stroke [4,5], and  
65 multiple sclerosis [6]. FES cycling was demonstrated to improve cardiovascular fitness,  
66 insulin sensitivity [7] bone density and muscle strength [2,8]. In recent years, FES-cycling  
67 has become particularly attractive for sedated critically ill patients. Early mobilization is  
68 the only intervention, which can partially prevent the development of intensive care unit-  
69 acquired weakness [9–14] - the major long-term consequence in the survivors of  
70 protracted critical illness [15,16]. Muscle atrophy [17,18] and dysfunction [18] occur very  
71 early in the critically ill and FES cycling can help to deliver exercise before the patient can  
72 co-operate with a physiotherapist [19].

73 Although FES cycling seems to be feasible in intensive care unit patients [19],  
74 before its effect on meaningful clinical outcomes can be tested in the critically ill and other  
75 vulnerable patients groups, important physiological questions need to be addressed.  
76 Metabolic efficacy (i.e. power output divided by metabolic cost) of the FES cycling is  
77 typically very low, around 5-10%, as compared to 25-40% in volitional cycling [20–22]).

78 This is likely due to non-physiological pattern of muscle activation, where large muscle  
79 groups are activated simultaneously rather than small well-coordinated units [2,23].  
80 Despite FES cycling increases cardiac output [24] and leg blood flow to the same extent  
81 [25] or even more [26] than volitional cycling and consequently oxygen delivery to the  
82 muscle should be normal, there are features suggesting early switch to anaerobic  
83 metabolism: early fatigue [23,27], rapid intramyocellular glycogen depletion [28], increase  
84 of respiratory quotient (RQ)  $>1$  [20] and even a mild increase in arterial lactate levels [29].  
85 Nonetheless, a direct evidence of the presence of anaerobic metabolism in skeletal muscle  
86 during FES cycling is lacking. Moreover, whilst the influence of volitional resistance  
87 exercise on amino acid metabolism has been extensively studied [30–34] there is no such  
88 data for FES cycling. These questions may be particularly relevant before FES-assisted  
89 exercise is introduced to critically ill patients, who are in profound protein catabolism and  
90 may be less able to clear lactate from systemic circulation.

91 In light of this we conducted a crossover study of volitional and FES supine cycling  
92 in healthy postprandial volunteers, where we combined indirect calorimetry with across-  
93 leg VA difference studies. We hypothesized that FES-cycling as compared to light  
94 volitional exercise would lead to increased production of lactate in correlation with  
95 widening of VA-CO<sub>2</sub> gap (as the measure of anaerobic metabolism), and with increased  
96 amino-acid efflux from skeletal muscle during exercise.

97

## 98 **Materials and methods**

### 99 **Overview of study design**

100 The study was performed during two visits performed 1 week apart. Subjects were  
101 asked to attend the visit at 08:00 AM after an overnight fast. In between these visits, the

102 subjects were advised to take their usual diet and avoid strenuous exercise. During the first  
103 visit, the volunteers underwent a physical examination and body composition  
104 measurement. After 30 min bed rest, their energy expenditure was measured using indirect  
105 calorimetry with a ventilated canopy system. Afterwards, in each subject's  $VO_{2MAX}$  was  
106 determined on a cycle ergometer with stepwise load by 25 W increments until exhaustion.  
107 During the second visit, subjects were given a standardized breakfast containing 70 g of  
108 carbohydrates, 10 g protein and 15 g of fat. Afterwards, femoral vein and radial artery were  
109 cannulated. After 30 min rest, the subjects were exposed in random order to one of two  
110 supine exercise protocols, separated by 3 hours rest. Both protocols begun with baseline  
111 measurements (AV difference studies and calorimetry) followed by 5 min of passive  
112 cycling. Then, the subjects either performed three 10 min cycles of volitional cycling (at  
113 10, 25 and 50 W, respectively) separated by 5 min of passive cycling (Group A), or FES  
114 cycling (Group B). The exercise protocols are outlined in Figure 1. University Hospital  
115 Kralovske Vinohrady's Ethical Review Board reviewed the protocol and approved the  
116 study. Prior to the enrolment, all subjects gave their written informed consent in  
117 accordance with the Declaration of Helsinki.

118

119 **Fig 1. Overview of study design.** Arrows designate arterial and venous blood sampling  
120 times. Note: ERGO = volitional cycling, FESCE = functional electrical stimulation  
121 cycling. Details of exercise are shown in the inset at the bottom.

122

## 123 **Study subjects**

124 Our experimental group consisted of 14 healthy volunteers. Their baseline  
125 characteristics are given in Table 1. Body fat was assessed using bioimpedance analysis  
126 (NutriGuard 2000, Bodystat, Germany).

127

128 **Table 1. Baseline characteristics of study subjects.**

129

| <b>Parameter</b>               | <b>Mean±SD</b> | <b>N</b> |
|--------------------------------|----------------|----------|
| Age (years)                    | 31±8           | 14       |
| Sex (M/F)                      | 11/3           | 14       |
| BMI (kg/m <sup>2</sup> )       | 23.7±3.7       | 14       |
| Body fat (%)                   | 14±6           | 14       |
| REE (kcal/day)                 | 1901±356       | 13       |
| RQ at rest                     | 0.90±0.10      | 13       |
| VO <sub>2MAX</sub> (ml/kg.min) | 41±6           | 13       |

130

131 Note: BMI = body mass index, REE = resting energy expenditure, RQ = respiratory  
132 quotient.

133

## 134 **Methods**

### 135 **Indirect calorimetry**

136 Resting energy expenditure and RQ were measured after overnight (12 h) fast and  
137 30 min bedrest using canopy Quark RMR device (Cosmed, Italy). To determine peak  
138 oxygen uptake (VO<sub>2max</sub>) exhaustive exercise test was performed in each subject on an  
139 electromagnetically braked bicycle ergometer Ergoline Ebike (Ergoline GmbH, Germany).  
140 After 5 min warm-up period, a workload of 50W was initiated and increased by 25 W  
141 every minute continuously until fatigue despite the verbal encouragement. Oxygen uptake  
142 was measured using Quark RMR device (Cosmed, Italy). ECG was monitored  
143 continuously.

## 144 **Cannulations**

145           Femoral vein was cannulated 2-3 cm below inguinal ligament under ultrasound  
146 guidance. In order to avoid the admixture of blood from saphenous and pelvic veins [35], a  
147 single-lumen central venous catheter (B-Braun, Germany) was inserted retrogradely to the  
148 depth of 10-15 cm so that the tip was deep in the femoral muscular compartment. For  
149 arterial sampling, we used a 22 F catheter (BBraun, Germany) inserted into the radial  
150 artery.

151           For both volitional and FES cycling we used RT-300 bikes (Restorative Therapies  
152 Ltd., USA) and the exercise was performed in supine position. *Volitional cycling* consisted  
153 of three 10 min intervals of active cycling: 10W (13 revolutions/min, resistance 7 N/m),  
154 25W (31 revolutions/minute, 7.6 N/m), 50W (35 revolutions/min, and resistance 13.4  
155 N/m). These period were preceded (warm up) and separated by 5 min of passive cycling at  
156 25 revolutions/min. *FES cycling*: Three pairs of transcutaneous electrodes (3 x 4",  
157 Restorative Therapies, Ltd., USA) electrodes were applied on each leg over quadriceps,  
158 hamstrings and gluteus maximus muscles, as per manufacturer's instructions. Prior to  
159 electrode placement, we measured the thickness of fat layer between the skin and muscle  
160 by ultrasound. After 5 min passive warm up (25 revolutions/min), the target speed was  
161 changed to 30 revolutions/min and stimulation gradually (1%/s) started to achieve 25 mA.  
162 Then, in each subject, the stimulation current was gradually increased to reach subjectively  
163 tolerated maximum. Oxygen uptake was measured continuously in both volitional and FES  
164 assisted cycling using mask breath-by-breath system (Quark RMR device, Cosmed, Italy).

## 165 **Laboratory methods**

166           Arterial and venous blood samples were analysed for blood gases, lactate and  
167 haemoglobin using POCT analyser Cobas b221 (Roche Diagnostics Limited, USA). For  
168 other analysis blood samples were centrifuged and frozen at -80°C until analysed. Serum

169 creatine kinase and myoglobin was measured in a certified institutional laboratory (Cobas  
170 system, Roche Diagnostics Ltd., USA). Serum amino acid concentration in arterial/venous  
171 blood was analysed using capillary electrophoresis as described [36].

172

## 173 **Calculations and statistics**

### 174 **Metabolic efficacy**

175 Metabolic efficacy of volitional cycling was calculated as power output divided by  
176 the increase of energy expenditure [2]. Veno-arterial gap in the total content of carbon  
177 dioxide (Ct-CO<sub>2</sub> gap) was calculated according to equations used in ABL 900 Analyser (by  
178 Radiometer, Copenhagen, Denmark).

$$179 \quad \text{Ct-CO}_2(\text{B}) = 9.286 \times 10^{-3} \times \text{pCO}_2 \times \text{ctHb} \times [1 + 10^{(\text{pH}_{\text{ERY}} - \text{pK}_{\text{ERY}})}] + \text{Ct-CO}_2(\text{P}) \times \left(1 - \frac{\text{ctHb}}{21.0}\right)$$

180 where Ct-CO<sub>2</sub>(B) = CO<sub>2</sub> content in blood in mmol/L; Ct-CO<sub>2</sub>(P) = CO<sub>2</sub> content in plasma  
181 in mmol/L and equals to 0.23 × pCO<sub>2</sub> + cHCO<sub>3</sub><sup>-</sup>(P); pCO<sub>2</sub> is partial pressure in kPa, ctHb =  
182 haemoglobin content in mmol/L. Ct-CO<sub>2</sub>(P). pH<sub>ERY</sub> = estimated intracellular pH in red  
183 blood cells, which equals to 7.19 + 0.77 × (pH - 7.4) + 0.035 × (1 - SO<sub>2</sub>), where S O<sub>2</sub> is  
184 haemoglobin saturation with oxygen; and finally pK<sub>ERY</sub> is a negative decadic logarithm of  
185 bicarbonate dissociation constant = 6.125 - log(1 + 10<sup>(pH<sub>ERY</sub> - 7.84 - 0.06 × SO<sub>2</sub>)</sup>).

### 186 **Blood flow**

187 In both FES and low intensity volitional cycling, leg oxygen uptake represents a  
188 relatively fixed proportion (76±8% vs. 78±9%, respectively) of whole-body oxygen uptake  
189 [37]. Therefore, an index of blood flow through the leg was calculated as whole-body  
190 oxygen consumption divided by the difference of oxygen content in arterial and femoral-  
191 venous blood. Blood oxygen content was calculated in mmol/L as 0.00983 × pO<sub>2</sub> +  
192 SO<sub>2</sub>[%]/100 × Hb × 0.06206 × (1 - COHb[%]/100 - metHb[%]), where S O<sub>2</sub> is saturation of



193 haemoglobin with oxygen [%], Hb is haemoglobin [mmol/L], CO-Hb and met-Hb are  
194 fractions of carbonyl and methemoglobin, respectively, and  $pO_2$  is partial pressure of  
195 oxygen [kPa]. At rest before volitional and FES cycling, blood flow index was  $6.6 \pm 2.4$  vs.  
196  $6.3 \pm 3.4$  ( $p=0.57$ ), and increased significantly ( $p<0.01$ ) and similarly ( $p=0.77$ ) to 160% and  
197 165% of baseline after volitional and FES exercise.

## 198 **Statistics**

199 We used linear mixed effect model for 2x2 crossover design processed with  
200 software Stata 15 (Stata Corp., LLC, U.S.A.). The model consists of fixed and random  
201 part. In the fixed part, the model contained following parameters: (1) Sequence, i.e. order  
202 in which subject performed volitional and FES cycling protocols. Had this parameter been  
203 significant, a carry-over effect would have been present; (2) Period, basal vs. active, a  
204 parameter exploring the effect of the exercise, regardless whether volitional or FES; (3)  
205 Treatment, exploits the difference between volitional and FES cycling; and (4) Interaction  
206 Period#Treatment exploits whether FES cycling differs from volitional cycling during  
207 exercise period. Random part of the model contains subject number in order to take into  
208 account repeated measurements. P value  $<0.05$  was considered as significant. Given the  
209 physiological nature of the study, we have not performed a formal power calculation and  
210 sample size is based on an assumption that a minimum of 7 subjects would be needed in  
211 each group to compare FES-driven and volitional cycling had there been a carry-over  
212 effect (i.e. a difference at 2<sup>nd</sup> baseline caused by previous intervention). In none of the  
213 measured values the Sequence parameter was significant ( $p = 0.14-0.94$ ), so we assume no  
214 carry over effect and do not report this value in the Results.

215

## 216 **Results**

### 217 **Tolerability and signs of muscle damage**

218 All 14 subjects finished the protocol without adverse events; baseline (visit 1)  
219 calorimetry data are available for 13 subjects only due to a technical problem. Maximum  
220 tolerated stimulation current of FES was  $45 \pm 13$  mA (range 25-67 mA). Although FES  
221 cycling caused a degree of discomfort, post-exercise serum myoglobin remained within  
222 reference range ( $<85$  ng/mL) in all subjects ( $33 \pm 15$  pg/mL, range 21-74). Nonetheless,  
223 there was a positive correlation between maximal stimulation current and post-exercise  
224 serum myoglobin ( $R^2=0.57$ ,  $p=0.002$ ).

### 225 **Metabolic efficacy of volitional vs. FES cycling**

226 Metabolic efficacy of volitional cycling was  $39.2 \pm 5.6\%$ . Unloaded FES cycling led  
227 to an increase of metabolic rate to  $138 \pm 29\%$  from baseline, which was comparable to the  
228 increase with 25 W volitional exercise ( $124 \pm 23\%$ ). See Figure 2. Energy gain from  
229 anaerobic glycolysis was negligible or negative for volitional cycling and  $5.0 \pm 6.2$  W for  
230 FES cycling.

231

232 **Fig 2. Hunt's diagram [2] outlining the efficacy of volitional exercise relative to**  
233 **metabolic cost of unloaded FES cycling (yellow line).** Note: Metabolic efficiency is the  
234 gradient of the line joining the active cycling operating point a to one of the baseline  
235 conditions: u is unloaded cycling; r is rest, p is passive cycling.

236

### 237 **Exploring muscle metabolism during FES cycling**

238 With volitional exercise, VA differences of both  $O_2$  and  $CO_2$  contents (Ct- $O_2$  and  
239 Ct- $CO_2$ ) tended to widen with volitional exercise (Fig. 3A and 3B), whilst the opposite

240 trend was seen for FES cycling. In line, there was no change in oxygen saturation of  
241 haemoglobin in femoral venous blood neither with volitional exercise (from  $63.9 \pm 12.7\%$  to  
242  $64.3 \pm 8.7\%$ ), whilst there was a surprising increase after FES cycling (from  $62.6 \pm 11.3$  to  
243  $70.3 \pm 8.7\%$ ;  $p=0.02$ ). Across-leg respiratory exchange ratio (i.e. the ratio between VA  
244 differences of  $\text{CO}_2$  and  $\text{O}_2$  contents) although different at baseline (Fig 3C) tended to  
245 increase with volitional cycling, but this change was not significant. There was no change  
246 from baseline in across-leg glucose uptake of glucose (FES  $-5.5 \pm 3.9$  to  $-5.9 \pm 3.6$  mmol/min;  
247 volitional  $-7.0 \pm 3.6$  to  $-6.9 \pm 6.1$  mmol/min). Whole body RQ increased with FES cycling  
248 ( $0.88 \pm 0.02$  to  $0.95 \pm 0.02$ ,  $p=0.001$ , but did not change with volitional exercise ( $0.87 \pm 0.02$   
249 to  $0.85 \pm 0.02$ ,  $p=0.55$ ; See Fig 3D) and only FES cycling led to an increase in across-leg  
250 lactate VA differences and production (from  $-1.1 \pm 2.1$  to  $5.5 \pm 7.4$  mmol/min,  $p<0.001$  vs.  
251 from  $-0.9 \pm 1.1$  to  $-0.4 \pm 1.2$  mmol/min,  $p=0.70$  Fig 3E) with very high inter-individual  
252 variability (See Fig. 3F). Systemic arterial lactate levels remained normal after volitional  
253 cycling (from  $1.6 \pm 0.6$  mmol/l to  $0.9 \pm 2.1$  mmol/l,  $p=0.887$ ), and increased after FES  
254 cycling (from  $1.6 \pm 0.7$  mmol/l to  $2.3 \pm 0.8$  mmol/l,  $p<0.001$ ).

255

256 **Fig 3. Venous-arterial (VA) differences studies.** Lactate VA difference is derived from  
257 multiplying femoral VA differences of concentrations and calculated leg blood flow. See  
258 text for further details. Note:  $\text{ctO}_2$  and  $\text{ctCO}_2$  = total blood content of oxygen and carbon  
259 dioxide; RQ = whole body respiratory quotient;  $\text{SvO}_2$  = femoral venous saturation of  
260 haemoglobin with oxygen. ERGO = volitional cycling; FESCE = functional electrical  
261 stimulation-assisted cycling; Passive period vs Active FES/50W volitional period.

262

263 **Analysing lactate production**

264 There was a significant positive correlation between VA lactate difference and  
265 femoral venous haemoglobin saturation with oxygen ( $R^2=0.6$ ,  $p=0.002$ , Fig 3G) and lactate  
266 producers had smaller veno-arterial difference in  $CO_2$  content of the blood ( $R^2=0.3$ ,  
267  $p=0.046$ , Fig 3H), effectively ruling out oxygen delivery problem due to low flow.  
268 Subjects with femoral VA lactate difference  $>0.5$  mmol/L (“lactate producers”,  $n=5$ , see  
269 Fig. 3F) were compared with the rest of the group ( $n=9$ ). Lactate producers tended to have  
270 smaller proportion of body fat (8 vs., 13%,  $p=0.131$ ) and had higher RQ at baseline  
271 ( $0.94\pm0.06$  vs.,  $0.86\pm0.07$ ,  $p=0.034$ ). Of note, stimulation current used during FES cycling  
272 was not different in lactate producers ( $42\pm10$  vs.  $44\pm16$  mA,  $p=0.87$ ).

### 273 **Amino acid metabolism**

274 As expected in postprandial volunteers, at baseline resting skeletal muscle was  
275 taking up branched-chain amino acids (BCAAs) whilst producing Alanine (Ala). Skeletal  
276 muscle only produced Glutamine (Gln) at baseline in the volitional cycling group,  
277 otherwise the change was not significantly different from zero (Fig. 4). Neither type of  
278 exercise led to a significant change of amino acid metabolism, but it is apparent from Fig.  
279 4 that with volitional cycling there was a trend to an increase in Ala production and a  
280 decrease of glutamine production, whilst after FES cycling no such a trend was apparent  
281 (across-leg amino acid exchange remained unaffected). Uptake of BCAAs continued and  
282 did not change with either type of exercise ( $p=0.83$  and  $p=0.86$ ).

283

284 **Fig 4. Amino acid metabolism during volitional and FES cycling.** Values are derived  
285 from multiplying femoral VA differences of concentrations and calculated leg blood flow.  
286 Note: BCAA = branched-chain amino acids (i.e. the sum of Valine, Leucine, and  
287 Isoleucine); ERGO = volitional cycling; FESCE = functional electrical stimulation-assisted

288 cycling; Passive period vs Active FES/50W volitional period. TCA = tricarboxylic acid  
289 cycle, 2-OG = 2-oxoglutarate.

290

## 291 **Discussion**

292 The major finding of our study is that unloaded supine FES cycling leads to lactate  
293 production without signs of muscle hypoperfusion, as low blood flow through exercising  
294 limbs would have caused femoral venous haemoglobin desaturation (Esaki et al., 2005;  
295 Sun et al., 2016) and widening of VA-CO<sub>2</sub> gap [40], which were not observed in our  
296 subjects. Moreover, there was a significant positive correlation between across-leg lactate  
297 production and femoral venous oxygenation, suggesting that subjects producing lactate did  
298 so whilst extracting less oxygen from (and producing less CO<sub>2</sub> into) the local circulation.  
299 There was a marked interindividual variability in metabolic response to FES cycling: some  
300 subjects responded to FES similarly to volitional cycling, whilst others produced so much  
301 lactate that it elevated systemic (arterial) lactate concentrations well above the normal  
302 range. We have not found any convincing characteristics of the subjects producing lactate  
303 during FES, although they seemed to be leaner and oxidizing more carbohydrates at  
304 baseline. The smaller distance between skin electrodes and the muscle in lactate producers  
305 might played a role, but notably there was no correlation between the amplitude of  
306 stimulation current used and the production of lactate.

307 Tissue dysoxia and femoral venous desaturations are known to accompany lactate  
308 production during high intensity volitional exercise (i.e. > approx. 60% VO<sub>2</sub> MAX) (Esaki et  
309 al., 2005; Gladden, 2004; Sun et al., 2016), at which oxidative phosphorylation becomes  
310 oxygen dependent. At lower exercise intensities, there is a concomitant lactate production  
311 in fast twitch glycolytic muscle fibres and consumption in slow twitch fibres [41] and - as

312 seen in our subjects - during a steady low intensity volitional exercise, skeletal muscle may  
313 become a net lactate consumer [42].

314 The most obvious explanation of FES-driven lactate production would be tissue  
315 dysoxia, occurring despite adequate flow of oxygenated blood through major vessels. Non-  
316 physiological asynchronous contractions of large muscle units activated by FES [2,23]  
317 could have caused an inhomogeneous perfusion at the level of microcirculation, with  
318 hypoxic regions and units with luxurious perfusion acting as functional AV shunts. The  
319 increase in whole-body RQ with FES cycling, would support the presence of some degree  
320 of anaerobic metabolism, but it could also be explained by impaired fatty acid oxidation  
321 with the preference of carbohydrate substrates [37] or by primary increased ventilation.  
322 The major argument against microcirculatory impairment and anaerobic lactate generation  
323 is the absence of widening of venous-arterial CO<sub>2</sub> gap. Carbon dioxide is produced also  
324 anaerobically and released from bicarbonate as the consequence of buffering acid load in  
325 hypoxic tissue, and because CO<sub>2</sub> diffuses rapidly even from poorly perfused tissue, VA-  
326 CO<sub>2</sub> gap is regarded as a very sensitive marker of tissue hypoxia caused by impaired  
327 microvascular flow [43]. Not only VA CO<sub>2</sub> gap was not widened after FES cycling, but in  
328 was inversely proportional to lactate production. Moreover, the 138±29% increase in the  
329 whole body oxygen consumption after FES-cycling observed by us and others [44] would  
330 also argue against major oxygen delivery problem.

331 Lactate production without tissue dysoxia may occur as a result of the dysbalance  
332 between pyruvate production from glycolysis and its conversion to acetyl-CoA and  
333 oxidation in tricarboxylic acid cycle [41,42]. Muscle contraction instantly triggers, via the  
334 increase in Ca<sup>2+</sup><sub>[IC]</sub>, glycogenolysis and glycolysis, producing pyruvate. Sudden increase in  
335 cytosolic pyruvate concentration shifts the near-equilibrium reaction: *Pyruvate* +  
336 *Glutamate* ↔ *Alanine* + *2-oxoglutarate*, rightwards. Alanine is increasingly released

337 during exercise and 2-oxoglutarate is believed to increase the functional capacity of  
338 tricarboxylic acid cycle [45] allowing for increase in oxidative ATP production. BCAAs  
339 uptake in skeletal muscle continues or even increases during exercise, providing carbons  
340 for oxidative pathways and nitrogen for Alanine and Glutamine formation (Fig. 4D).  
341 Although non-significant, we have observed some trends to these responses after volitional  
342 cycling, but no rearrangement at all of amino acid metabolism was seen with FES exercise.  
343 Glycolytic compartment is known to respond much faster compared to oxidative  
344 phosphorylation and a rapid increase in cytosolic pyruvate concentration could lead to  
345 lactate release from cells even in the absence of tissue hypoxia [41]. Moreover, FES  
346 cycling compared to volitional exercise is known to activate glycogenolysis and glycolysis  
347 disproportionately faster than oxidative pathways [20,37]. In light of this, our data are  
348 consistent with aerobic lactate generation due to a dysbalance between pyruvate generation  
349 from glycogenolysis and glycolysis and its oxidation in citric acid cycle. Indeed, skeletal  
350 muscle is not a metabolically homogenous tissue [42] and FES may preferentially trigger  
351 muscle contraction in glycolytic fast twitch fibres, whilst lactate oxidizing slow fibres may  
352 have been less sensitive to electrical stimulation. The sensitivity of different muscle fibres  
353 to external stimulation is unknown and remains to be studied, but a higher sensitivity of  
354 fast twitch fibres would be in keeping with the finding, that a long-term external electrical  
355 stimulation of a denervated muscle restores its mass and contractile power, but not  
356 fatigability [46].

357 From clinical point of view we found important the absence of venous haemoglobin  
358 desaturation during FES-cycling as decreased central venous saturation impairs systemic  
359 oxygenation in patients with a degree of intrapulmonary shunt. Mild lactic acidosis could  
360 be of concern in patients with impaired lactate clearance (e.g. liver failure). Unloaded FES  
361 cycling led to  $VO_2$  response comparable to 25W volitional exercise, which would represent

362 a very significant exercise load for critically ill patients, who tend to have even higher  
363 metabolic cost for a given power output [47] and only tolerated cycling at 3-6 W in one  
364 study [47]. Lastly, although the absence of laboratory signs of muscle damage and amino  
365 acid release is reassuring, the positive association of post-exercise serum myoglobin with  
366 stimulation current amplitude suggest a risk of muscle damage from the use of stimulation  
367 currents above 70mA, which are often needed to elicit visible contractions in sedated  
368 critically ill patient, perhaps due to their impaired muscle excitability [16].

369         The major weakness of our study is that we have not used direct measurements of  
370 leg blood flow and tissue oxygenation. However, effects of FES exercise on leg blood flow  
371 are known (Kim et al., 1995; Levine et al., 2008) and the main finding of the study, i.e.  
372 lactate production without evidence of tissue hypoxia, can be supported by across-leg VA  
373 differences alone. Muscle tissue oxygen concentrations are known to be closely reflected  
374 by femoral venous oxygen content (Mathewson et al., 2015; Sun et al., 2016).

375         In conclusion, we have demonstrated that 10 min of supine FES cycling in healthy  
376 volunteers leads to production of lactate without features suggestive oxygen  
377 consumption/delivery mismatch, which are known to accompany lactate production during  
378 high intensity voluntary exercise (Esaki et al., 2005; Sun et al., 2016). Despite a significant  
379 increase in systemic oxygen consumption (proportional to 25W of volitional exercise) and  
380 unaltered across-leg glucose uptake with FES cycling, we have not observed the  
381 rearrangement of amino acid metabolism towards anaplerosis.

382

### 383 **Acknowledgements:**

384 The authors thank to Jana Potočková, Šárka Gregorová, Šárka Vosalová for technical  
385 assistance and to all healthy volunteers, who decided to participate in this study.

386



## 387 **References**

- 388 1. Glaser RM. Physiologic aspects of spinal cord injury and functional  
389 neuromuscular stimulation. *Cent Nerv Syst Trauma*. 1986;3: 49–62.  
390 Available: <http://www.ncbi.nlm.nih.gov/pubmed/3524868>
- 391 2. Hunt KJ, Fang J, Saengsuwan J, Grob M, Laubacher M. On the  
392 efficiency of FES cycling: a framework and systematic review. *Technol*  
393 *Health Care*. 2012;20: 395–422. doi:10.3233/THC-2012-0689
- 394 3. Szecsi J, Schiller M. FES-propelled cycling of SCI subjects with highly  
395 spastic leg musculature. *NeuroRehabilitation*. 2009;24: 243–53.  
396 doi:10.3233/NRE-2009-0475
- 397 4. Lo H-C, Hsu Y-C, Hsueh Y-H, Yeh C-Y. Cycling exercise with  
398 functional electrical stimulation improves postural control in stroke  
399 patients. *Gait Posture*. 2012;35: 506–10.  
400 doi:10.1016/j.gaitpost.2011.11.017
- 401 5. Peri E, Ambrosini E, Pedrocchi A, Ferrigno G, Nava C, Longoni V, et al.  
402 Can FES-Augmented Active Cycling Training Improve Locomotion in  
403 Post-Acute Elderly Stroke Patients? *Eur J Transl Myol*. PAGEPress;  
404 2016;26: 6063. doi:10.4081/ejtm.2016.6063
- 405 6. Szecsi J, Schlick C, Schiller M, Pöllmann W, Koenig N, Straube A.  
406 Functional electrical stimulation-assisted cycling of patients with  
407 multiple sclerosis: Biomechanical and functional outcome – A pilot  
408 study. *J Rehabil Med*. 2009;41: 674–680. doi:10.2340/16501977-0397
- 409 7. Mohr T, Dela F, Handberg A, Biering-Sørensen F, Galbo H, Kjaer M.  
410 Insulin action and long-term electrically induced training in individuals  
411 with spinal cord injuries. *Med Sci Sports Exerc*. 2001;33: 1247–52.  
412 Available: <http://www.ncbi.nlm.nih.gov/pubmed/11474322>
- 413 8. Young W. Electrical Stimulation and Motor Recovery. *Cell Transplant*.  
414 2015;24: 429–446. doi:10.3727/096368915X686904
- 415 9. Morris PE, Herridge MS. Early intensive care unit mobility: future  
416 directions. *Crit Care Clin*. Elsevier; 2007;23: 97–110.  
417 doi:10.1016/j.ccc.2006.11.010
- 418 10. Schweickert WD, Kress JP. Implementing Early Mobilization  
419 Interventions in Mechanically Ventilated Patients in the ICU. *Chest*.

- 420 2011;140: 1612–1617. doi:10.1378/chest.10-2829
- 421 11. Choong K, Koo KKY, Clark H, Chu R, Thabane L, Burns KEA, et al.  
422 Early Mobilization in Critically Ill Children. *Crit Care Med.* 2013;41:  
423 1745–1753. doi:10.1097/CCM.0b013e318287f592
- 424 12. TEAM Study Investigators, Hodgson C, Bellomo R, Berney S, Bailey  
425 M, Buhr H, et al. Early mobilization and recovery in mechanically  
426 ventilated patients in the ICU: a bi-national, multi-centre, prospective  
427 cohort study. *Crit Care.* 2015;19: 81. doi:10.1186/s13054-015-0765-4
- 428 13. Pawlik AJ. Early Mobilization in the Management of Critical Illness.  
429 *Crit Care Nurs Clin North Am.* 2012;24: 481–490.  
430 doi:10.1016/j.ccell.2012.05.003
- 431 14. Friedrich O, Reid MB, Van den Berghe G, Vanhorebeek I, Hermans G,  
432 Rich MM, et al. The Sick and the Weak: Neuropathies/Myopathies in the  
433 Critically Ill. *Physiol Rev.* American Physiological Society; 2015;95:  
434 1025–109. doi:10.1152/physrev.00028.2014
- 435 15. Herridge MS, Tansey CM, Matté A, Tomlinson G, Diaz-Granados N,  
436 Cooper A, et al. Functional Disability 5 Years after Acute Respiratory  
437 Distress Syndrome. *N Engl J Med.* 2011;364: 1293–1304.  
438 doi:10.1056/NEJMoa1011802
- 439 16. Kress JP, Hall JB. ICU-Acquired Weakness and Recovery from Critical  
440 Illness. *N Engl J Med.* 2014;370: 1626–1635.  
441 doi:10.1056/NEJMra1209390
- 442 17. Levine S, Nguyen T, Taylor N, Friscia ME, Budak MT, Rothenberg P, et  
443 al. Rapid Disuse Atrophy of Diaphragm Fibers in Mechanically  
444 Ventilated Humans. *N Engl J Med.* 2008;358: 1327–1335.  
445 doi:10.1056/NEJMoa070447
- 446 18. Parry SM, Puthuchery ZA. The impact of extended bed rest on the  
447 musculoskeletal system in the critical care environment. *Extrem Physiol*  
448 *Med. BioMed Central;* 2015;4: 16. doi:10.1186/s13728-015-0036-7
- 449 19. Parry SM, Berney S, Warrillow S, El-Ansary D, Bryant AL, Hart N, et  
450 al. Functional electrical stimulation with cycling in the critically ill: A  
451 pilot case-matched control study. *J Crit Care.* 2014;29: 695.e1-695.e7.  
452 doi:10.1016/j.jcrc.2014.03.017
- 453 20. Duffell LD, de N. Donaldson N, Newham DJ. Why is the Metabolic

- 454 Efficiency of FES Cycling Low? *IEEE Trans Neural Syst Rehabil Eng.*  
455 2009;17: 263–269. doi:10.1109/TNSRE.2009.2016199
- 456 21. Hunt KJ, Hosmann D, Grob M, Saengsuwan J. Metabolic efficiency of  
457 volitional and electrically stimulated cycling in able-bodied subjects.  
458 *Med Eng Phys.* 2013;35: 919–925.  
459 doi:10.1016/j.medengphy.2012.08.023
- 460 22. Hunt KJ, Ferrario C, Grant S, Stone B, McLean AN, Fraser MH, et al.  
461 Comparison of stimulation patterns for FES-cycling using measures of  
462 oxygen cost and stimulation cost. *Med Eng Phys.* Elsevier; 2006;28:  
463 710–8. doi:10.1016/j.medengphy.2005.10.006
- 464 23. Downey RJ, Merad M, Gonzalez EJ, Dixon WE. The Time-Varying  
465 Nature of Electromechanical Delay and Muscle Control Effectiveness in  
466 Response to Stimulation-Induced Fatigue. *IEEE Trans Neural Syst*  
467 *Rehabil Eng.* 2017;25: 1397–1408. doi:10.1109/TNSRE.2016.2626471
- 468 24. Kjaer M, Perko G, Secher NH, Boushel R, Beyer N, Pollack S, et al.  
469 Cardiovascular and ventilatory responses to electrically induced cycling  
470 with complete epidural anaesthesia in humans. *Acta Physiol Scand.*  
471 Blackwell Publishing Ltd; 1994;151: 199–207. doi:10.1111/j.1748-  
472 1716.1994.tb09738.x
- 473 25. Kim CK, Strange S, Bangsbo J, Saltin B. Skeletal muscle perfusion in  
474 electrically induced dynamic exercise in humans. *Acta Physiol Scand.*  
475 Blackwell Publishing Ltd; 1995;153: 279–287. doi:10.1111/j.1748-  
476 1716.1995.tb09864.x
- 477 26. Scremin OU, Cuevas-Trisan RL, Scremin AM, Brown C V, Mandelkern  
478 MA. Functional electrical stimulation effect on skeletal muscle blood  
479 flow measured with H<sub>2</sub>(15)O positron emission tomography. *Arch Phys*  
480 *Med Rehabil.* 1998;79: 641–6. Available:  
481 <http://www.ncbi.nlm.nih.gov/pubmed/9630142>
- 482 27. Tepavac D, Schwirtlich L. Detection and prediction of FES-induced  
483 fatigue. *J Electromyogr Kinesiol.* 1997;7: 39–50. Available:  
484 <http://www.ncbi.nlm.nih.gov/pubmed/20719690>
- 485 28. Kim CK, Bangsbo J, Strange S, Karpakka J, Saltin B. Metabolic  
486 response and muscle glycogen depletion pattern during prolonged  
487 electrically induced dynamic exercise in man. *Scand J Rehabil Med.*

- 488 1995;27: 51–8. Available:  
489 <http://www.ncbi.nlm.nih.gov/pubmed/7792551>
- 490 29. Glaser RM. Physiology of Functional Electrical Stimulation-Induced  
491 Exercise: Basic Science Perspective. *Neurorehabil Neural Repair*. Sage  
492 PublicationsSage CA: Thousand Oaks, CA; 1991;5: 49–61.  
493 doi:10.1177/136140969100500106
- 494 30. Dreyer HC, Fujita S, Cadenas JG, Chinkes DL, Volpi E, Rasmussen BB.  
495 Resistance exercise increases AMPK activity and reduces 4E-BP1  
496 phosphorylation and protein synthesis in human skeletal muscle. *J*  
497 *Physiol*. Wiley-Blackwell; 2006;576: 613–24.  
498 doi:10.1113/jphysiol.2006.113175
- 499 31. Hulston CJ, Wolsk E, Grondhal TS, Yfanti C, Van Hall G. Protein Intake  
500 Does Not Increase Vastus Lateralis Muscle Protein Synthesis during  
501 Cycling. *Med Sci Sport Exerc*. 2011;43: 1635–1642.  
502 doi:10.1249/MSS.0b013e31821661ab
- 503 32. Biolo G, Maggi SP, Williams BD, Tipton KD, Wolfe RR. Increased rates  
504 of muscle protein turnover and amino acid transport after resistance  
505 exercise in humans. *Am J Physiol Metab*. 1995;268: E514–E520.  
506 doi:10.1152/ajpendo.1995.268.3.E514
- 507 33. Holm L, van Hall G, Rose AJ, Miller BF, Doessing S, Richter EA, et al.  
508 Contraction intensity and feeding affect collagen and myofibrillar protein  
509 synthesis rates differently in human skeletal muscle. *Am J Physiol*  
510 *Metab*. 2010;298: E257–E269. doi:10.1152/ajpendo.00609.2009
- 511 34. Dideriksen K, Reitelseder S, Holm L. Influence of Amino Acids, Dietary  
512 Protein, and Physical Activity on Muscle Mass Development in Humans.  
513 *Nutrients*. 2013;5: 852–876. doi:10.3390/nu5030852
- 514 35. van Hall G, González-Alonso J, Sacchetti M, Saltin B. Skeletal muscle  
515 substrate metabolism during exercise: methodological considerations.  
516 *Proc Nutr Soc*. 1999;58: 899–912. Available:  
517 <http://www.ncbi.nlm.nih.gov/pubmed/10817157>
- 518 36. Tůma P. Rapid determination of globin chains in red blood cells by  
519 capillary electrophoresis using INSTCoated fused-silica capillary. *J Sep*  
520 *Sci*. 2014;37: 1026–1032. Available:  
521 <http://dx.doi.org/10.1002/jssc.201400044>

- 522 37. Kjær M, Dela F, Sørensen FB, Secher NH, Bangsbo J, Mohr T, et al.  
523 Fatty acid kinetics and carbohydrate metabolism during electrical  
524 exercise in spinal cord-injured humans. *Am J Physiol Integr Comp*  
525 *Physiol.* American Physiological Society Bethesda, MD ; 2001;281:  
526 R1492–R1498. doi:10.1152/ajpregu.2001.281.5.R1492
- 527 38. Esaki K, Hamaoka T, Rådegran G, Boushel R, Hansen J, Katsumura T,  
528 et al. Association between regional quadriceps oxygenation and blood  
529 oxygen saturation during normoxic one-legged dynamic knee extension.  
530 *Eur J Appl Physiol.* 2005;95: 361–370. doi:10.1007/s00421-005-0008-5
- 531 39. Sun Y, Ferguson BS, Rogatzki MJ, McDonald JR, Gladden LB. Muscle  
532 Near-Infrared Spectroscopy Signals versus Venous Blood Hemoglobin  
533 Oxygen Saturation in Skeletal Muscle. *Med Sci Sport Exerc.* 2016;48:  
534 2013–2020. doi:10.1249/MSS.0000000000001001
- 535 40. Vallet B, Teboul J-L, Cain S, Curtis S. Venoarterial CO<sub>2</sub> difference  
536 during regional ischemic or hypoxic hypoxia. *J Appl Physiol.* 2000;89:  
537 1317–1321. doi:10.1152/jappl.2000.89.4.1317
- 538 41. Gladden LB. Lactate metabolism: a new paradigm for the third  
539 millennium. *J Physiol.* Wiley-Blackwell; 2004;558: 5–30.  
540 doi:10.1113/jphysiol.2003.058701
- 541 42. Brooks GA. Intra- and extra-cellular lactate shuttles. *Med Sci Sports*  
542 *Exerc.* 2000;32: 790–9. Available:  
543 <http://www.ncbi.nlm.nih.gov/pubmed/10776898>
- 544 43. Mallat J, Lemyze M, Meddour M, Pepy F, Gasan G, Barrailler S, et al.  
545 Ratios of central venous-to-arterial carbon dioxide content or tension to  
546 arteriovenous oxygen content are better markers of global anaerobic  
547 metabolism than lactate in septic shock patients. *Ann Intensive Care.*  
548 Springer; 2016;6: 10. doi:10.1186/s13613-016-0110-3
- 549 44. Hettinga DM, Andrews BJ. Oxygen consumption during functional  
550 electrical stimulation-assisted exercise in persons with spinal cord injury:  
551 implications for fitness and health. *Sports Med.* 2008;38: 825–38.  
552 Available: <http://www.ncbi.nlm.nih.gov/pubmed/18803435>
- 553 45. Wagenmakers AJ. Muscle amino acid metabolism at rest and during  
554 exercise: role in human physiology and metabolism. *Exerc Sport Sci*  
555 *Rev.* 1998;26: 287–314. Available:

- 556 <http://www.ncbi.nlm.nih.gov/pubmed/9696993>
- 557 46. Ashley Z, Sutherland H, Russold MF, Lanmüller H, Mayr W, Jarvis JC,  
558 et al. Therapeutic stimulation of denervated muscles: The influence of  
559 pattern. *Muscle Nerve*. 2008;38: 875–886. doi:10.1002/mus.21020
- 560 47. Hickmann CE, Roeseler J, Castanares-Zapatero D, Herrera EI,  
561 Mongodin A, Laterre P-F. Energy expenditure in the critically ill  
562 performing early physical therapy. *Intensive Care Med*. 2014;40: 548–  
563 555. doi:10.1007/s00134-014-3218-7
- 564 48. Mathewson KW, Haykowsky MJ, Thompson RB. Feasibility and  
565 reproducibility of measurement of whole muscle blood flow, oxygen  
566 extraction, and VO<sub>2</sub> with dynamic exercise using MRI. *Magn Reson*  
567 *Med*. 2015;74: 1640–1651. doi:10.1002/mrm.25564

568

## 569 Supporting information

570

571 **S1 Table. Dataset spreadsheet.**

572

573

574

# Visit 1

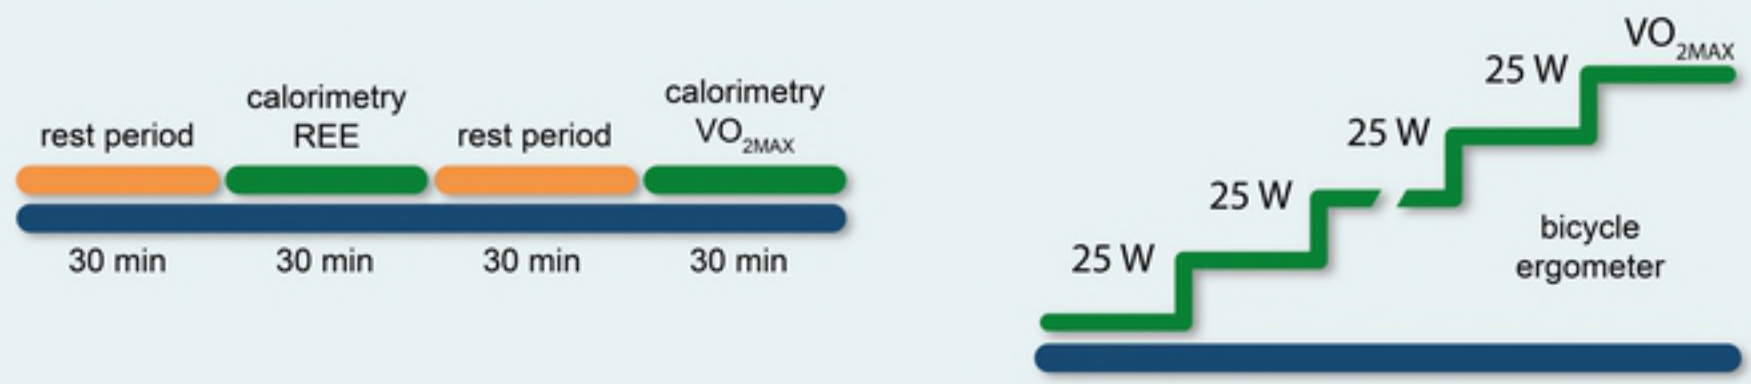

# Visit 2

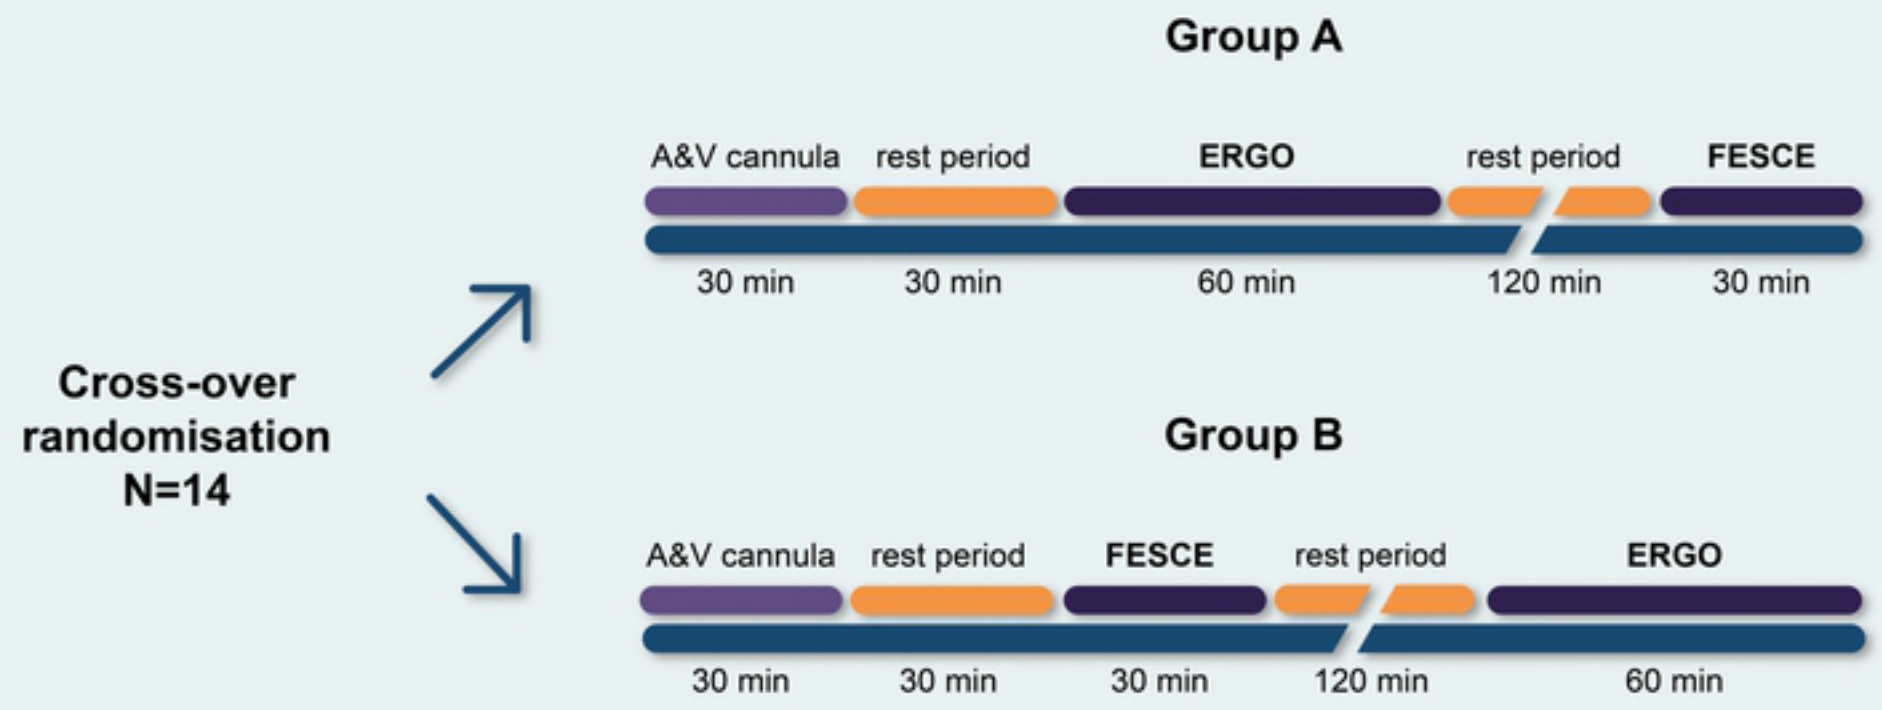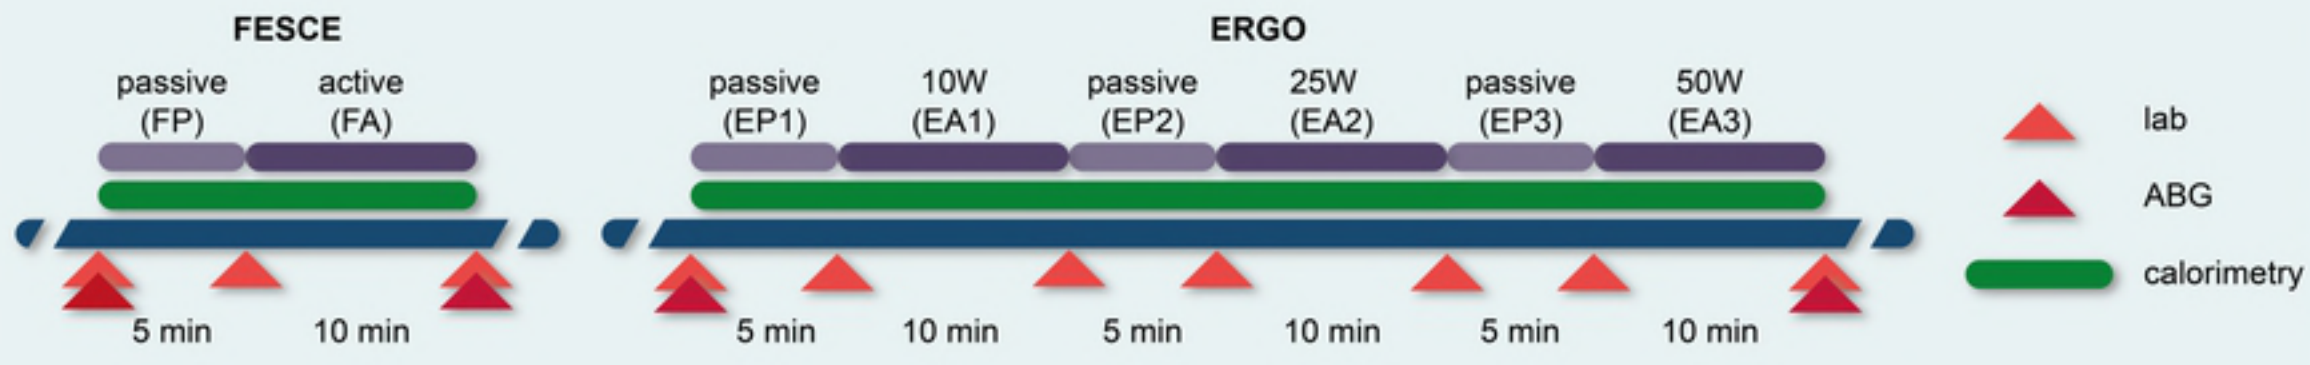

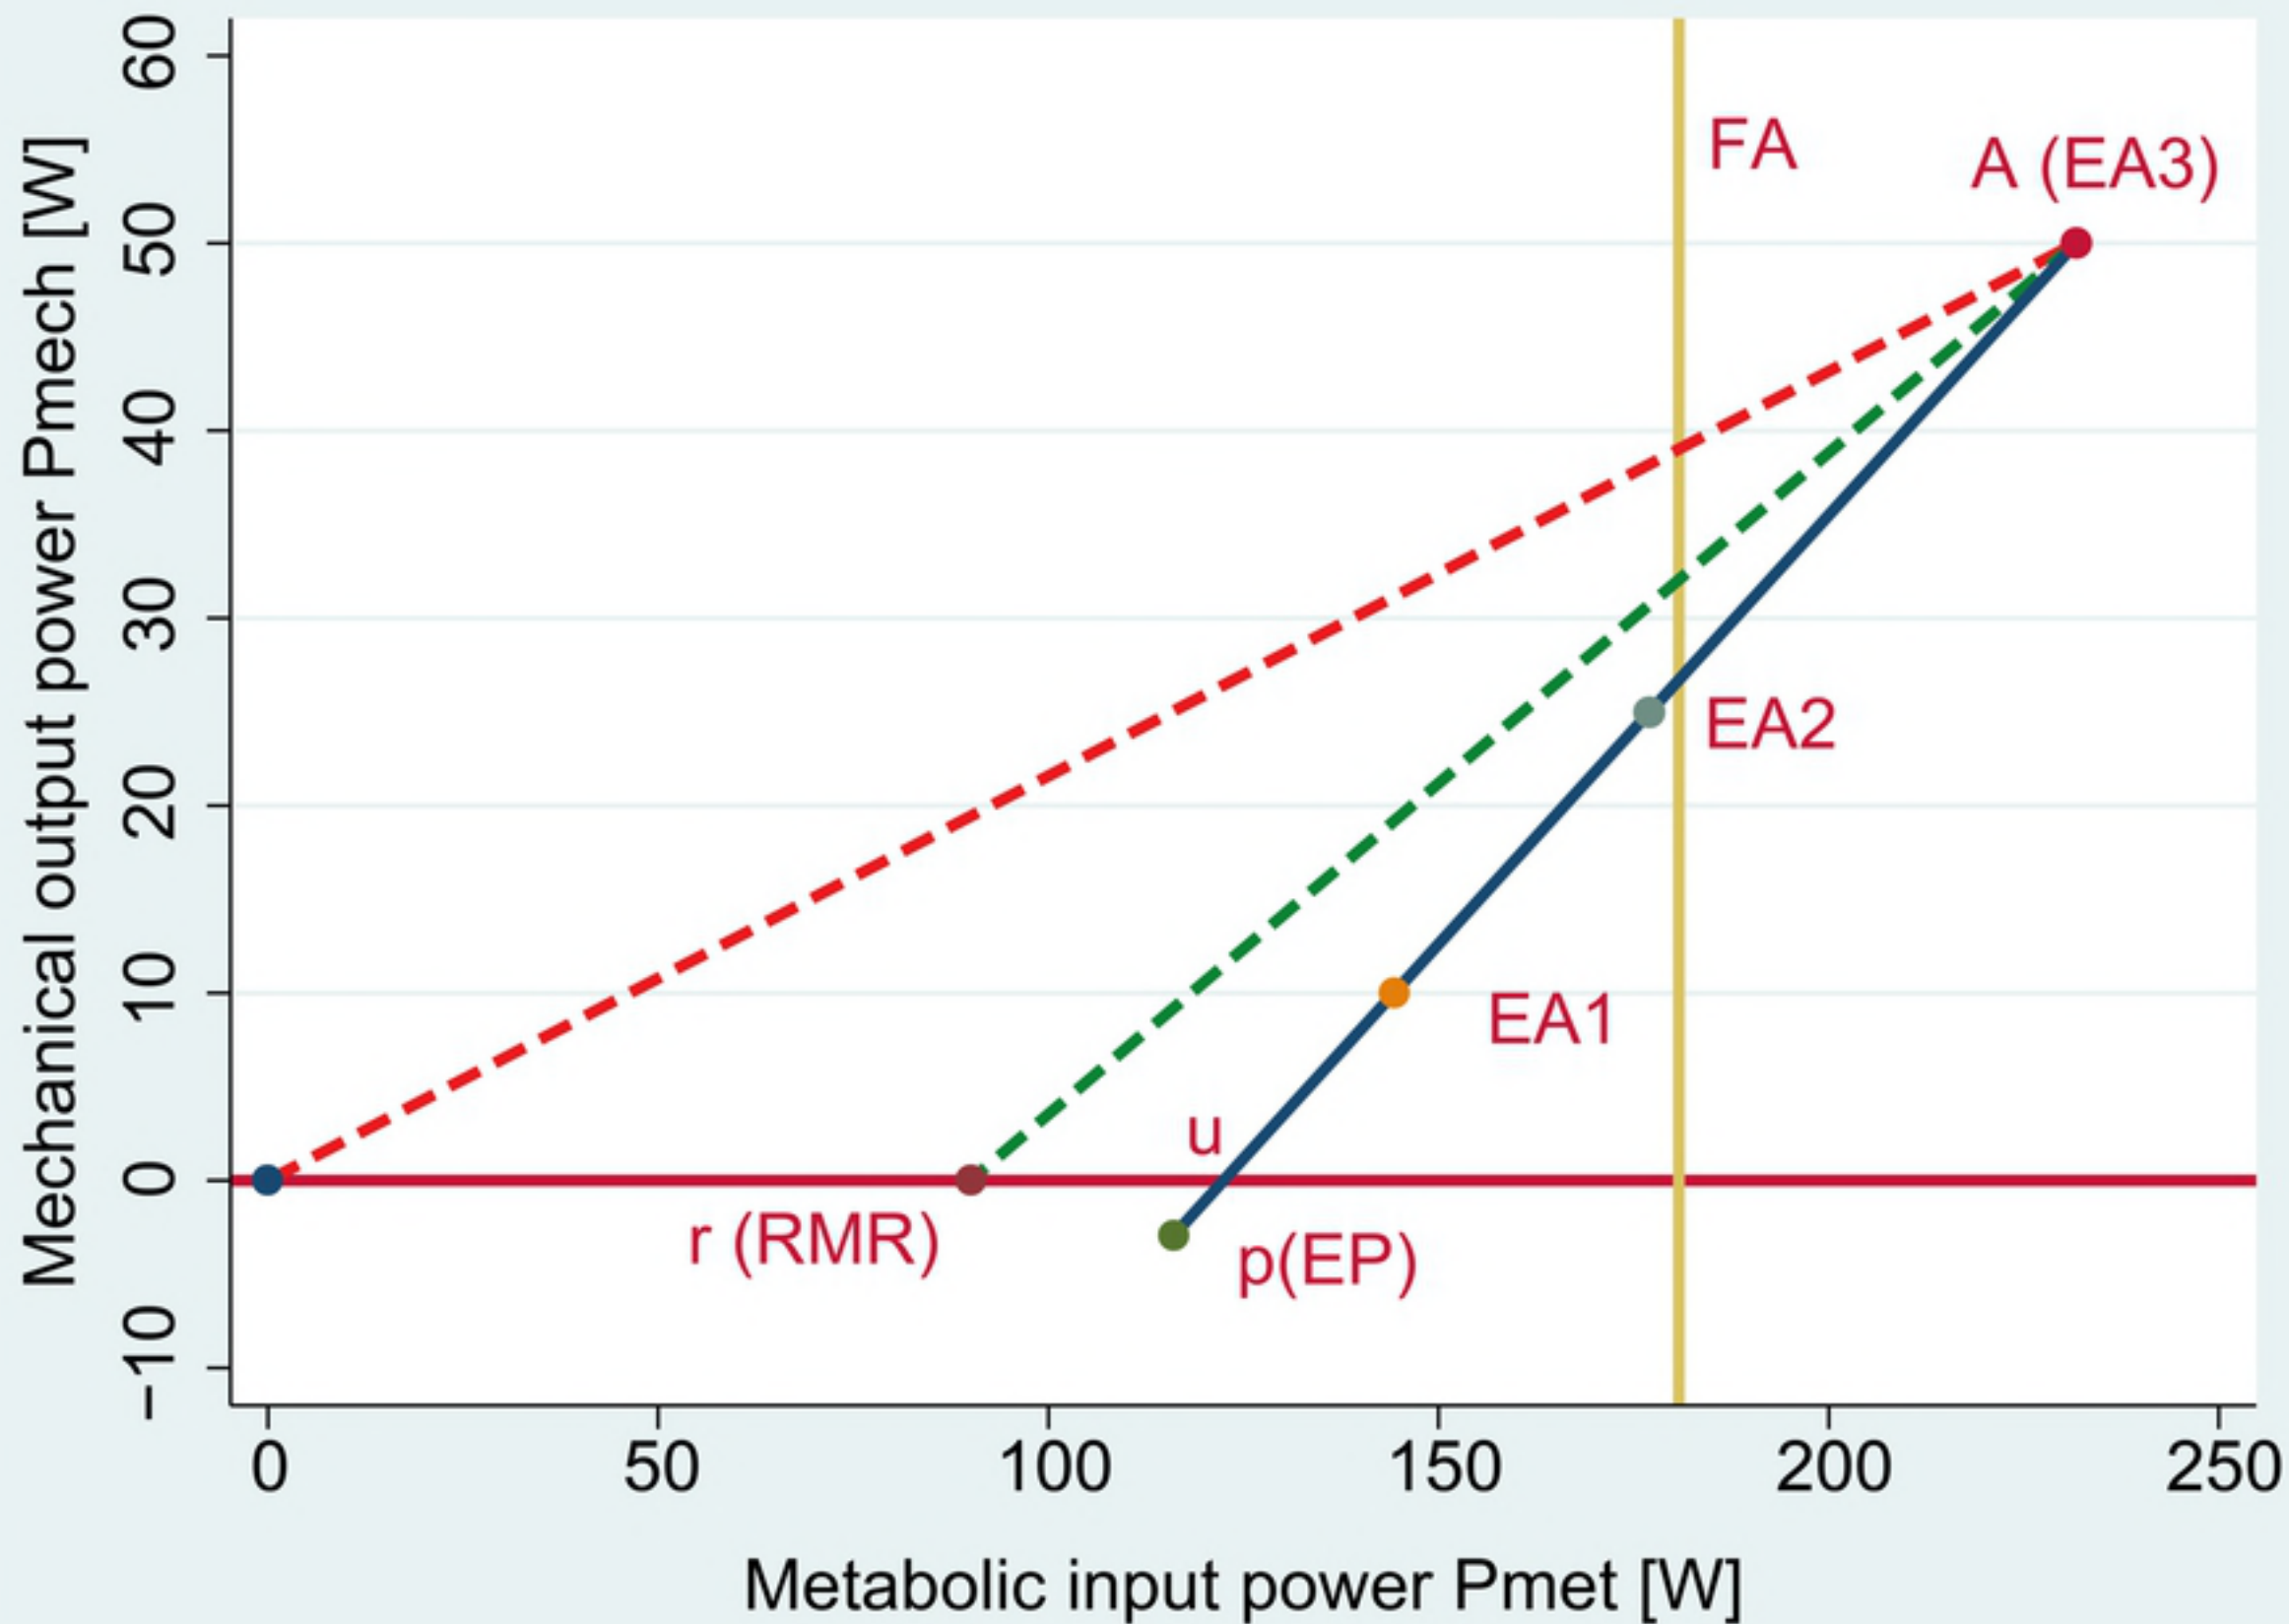



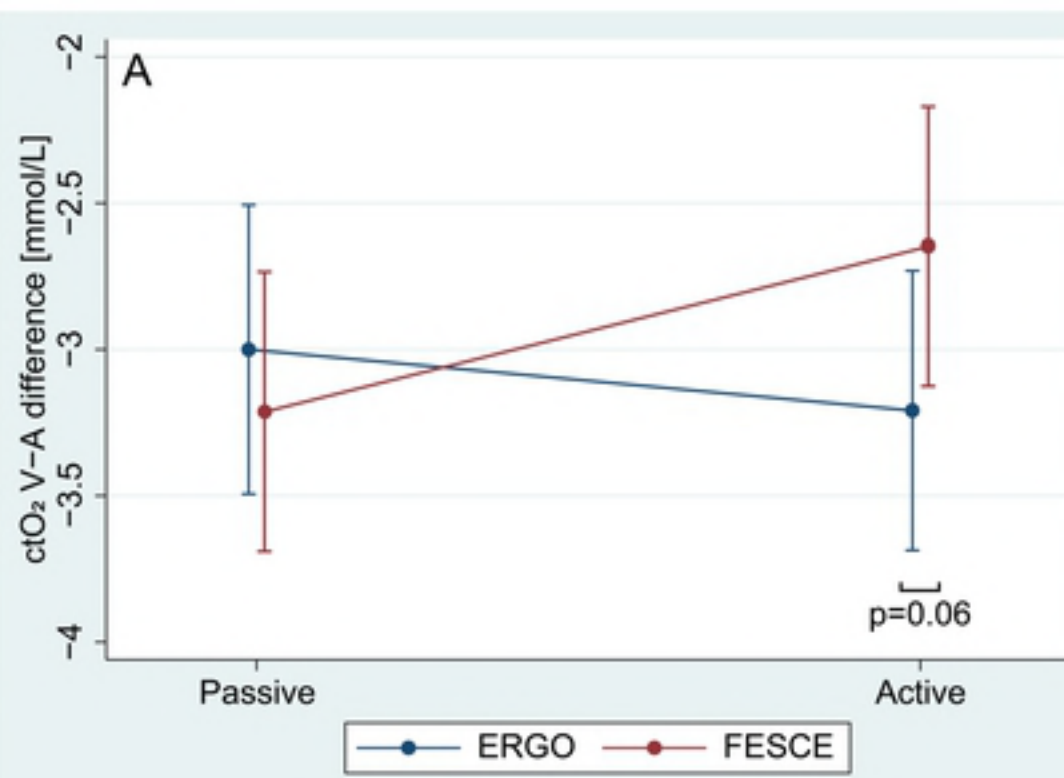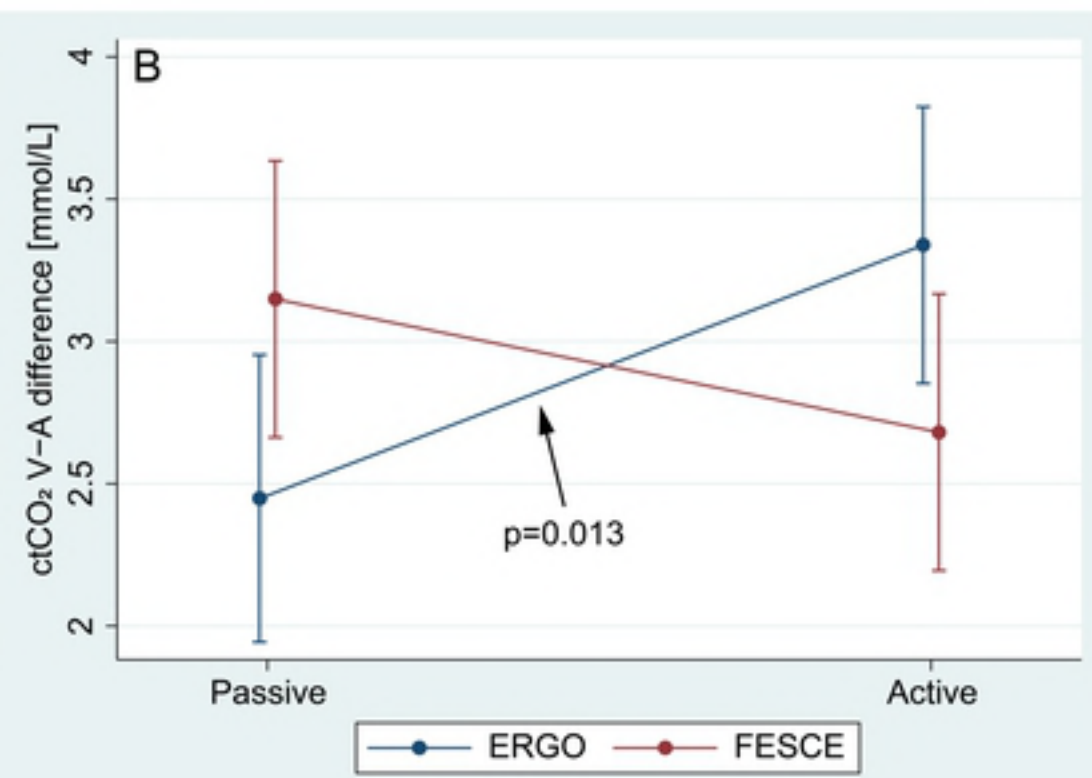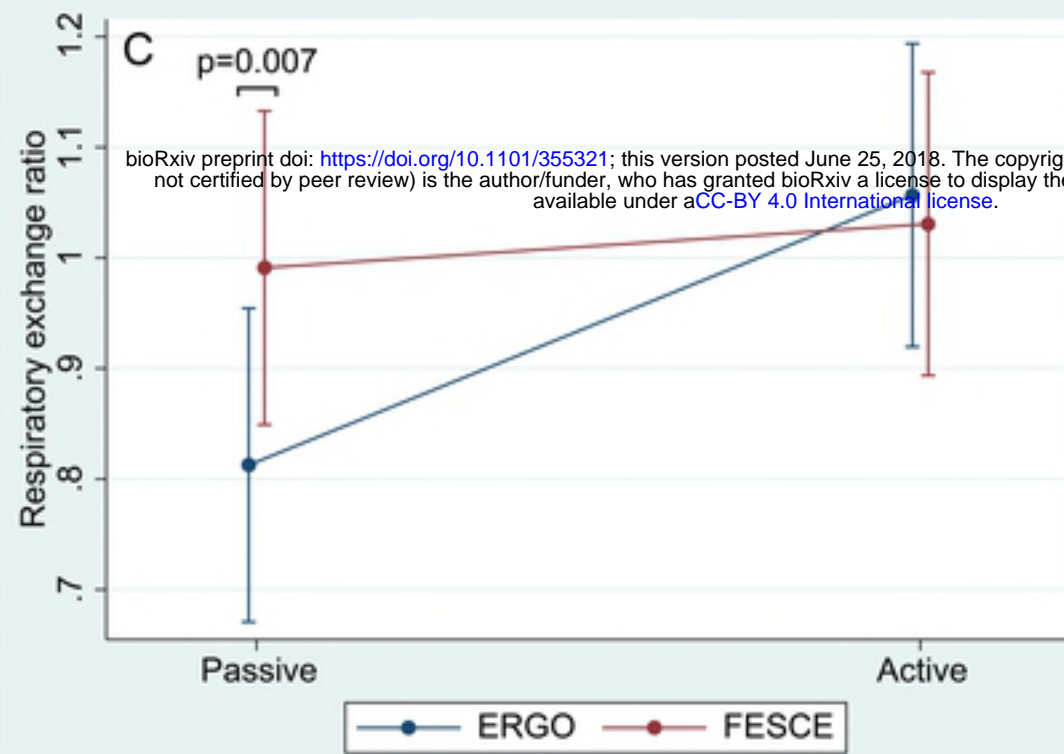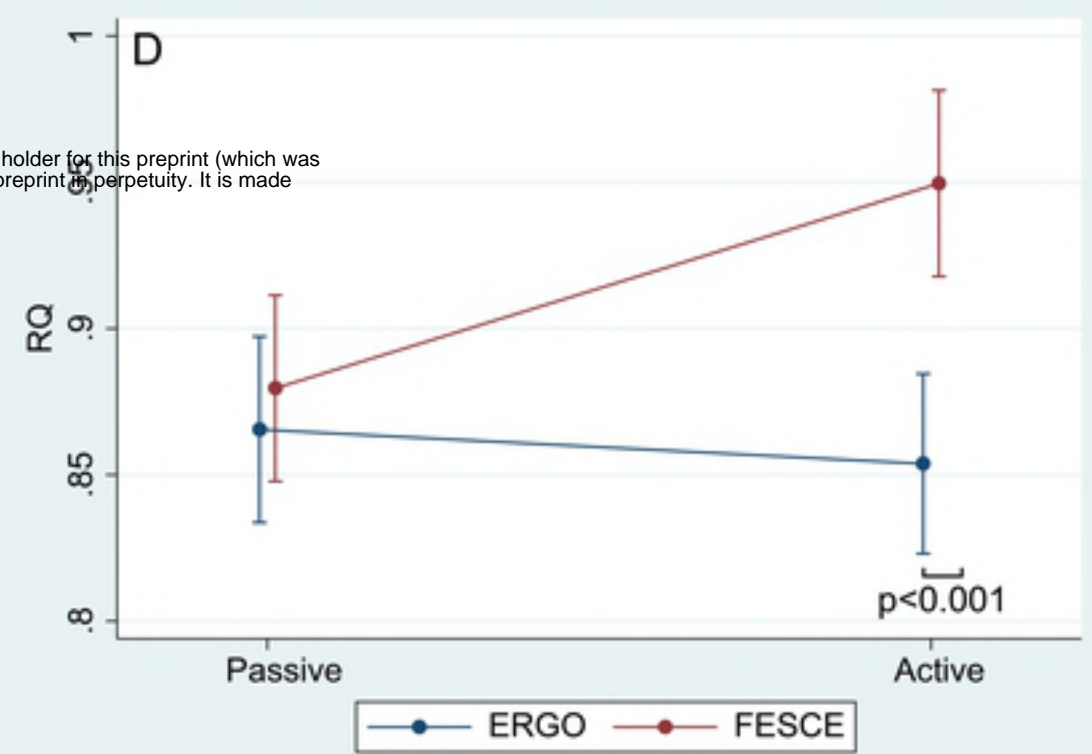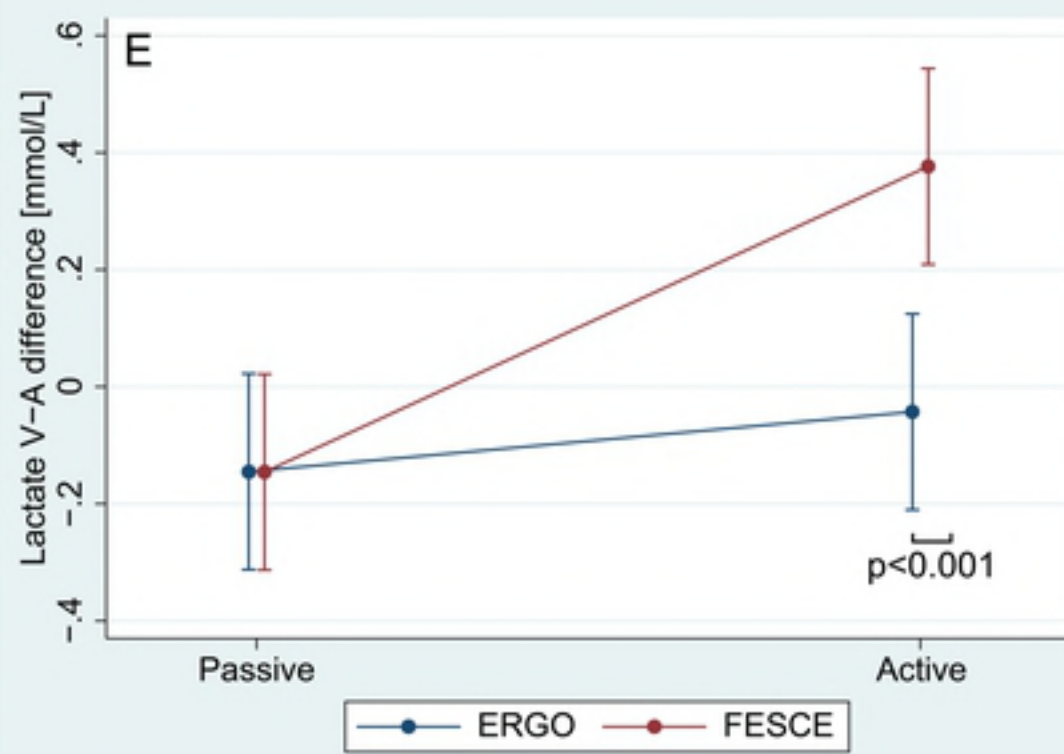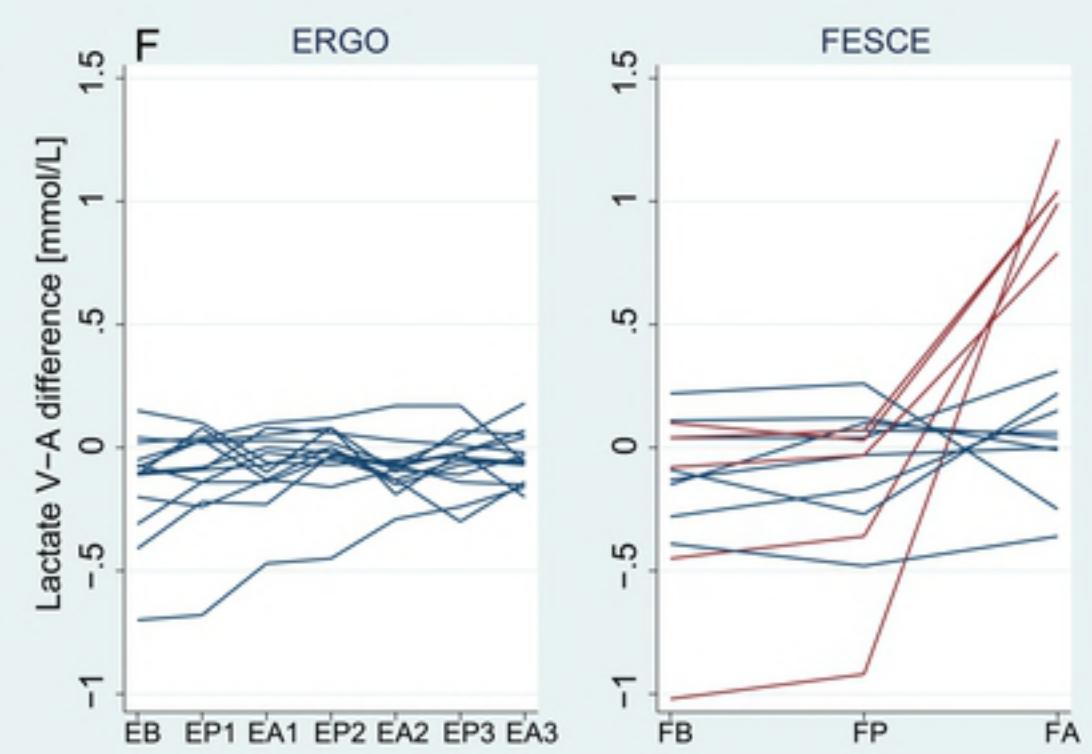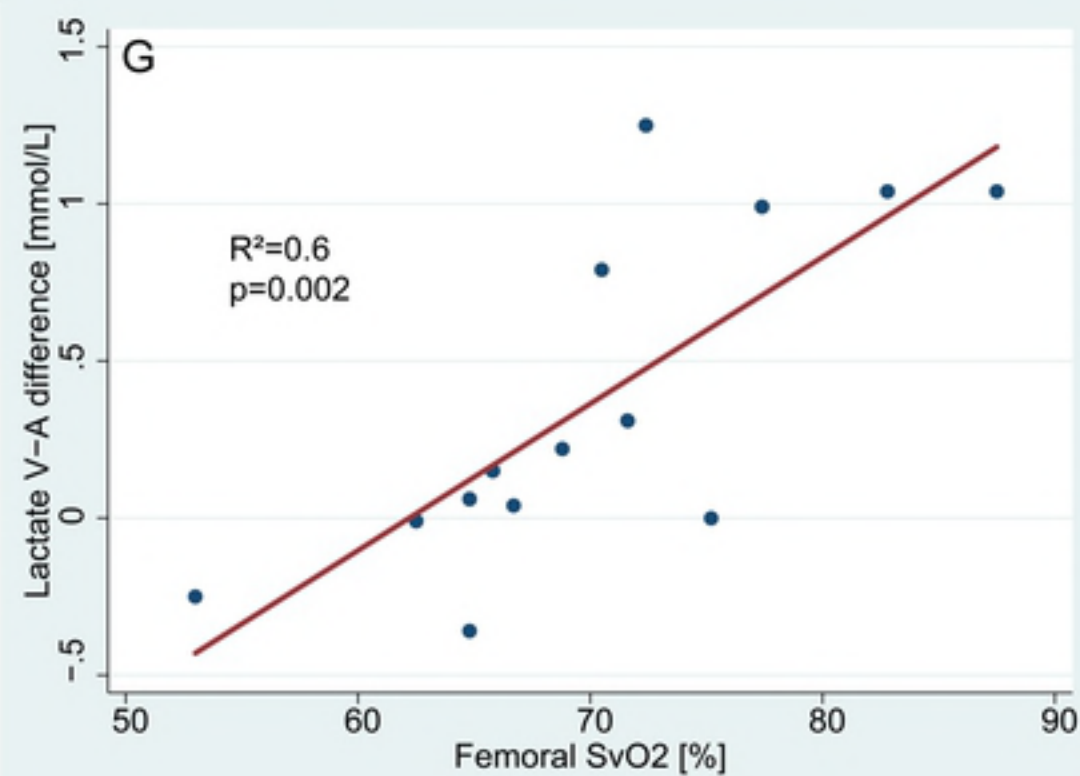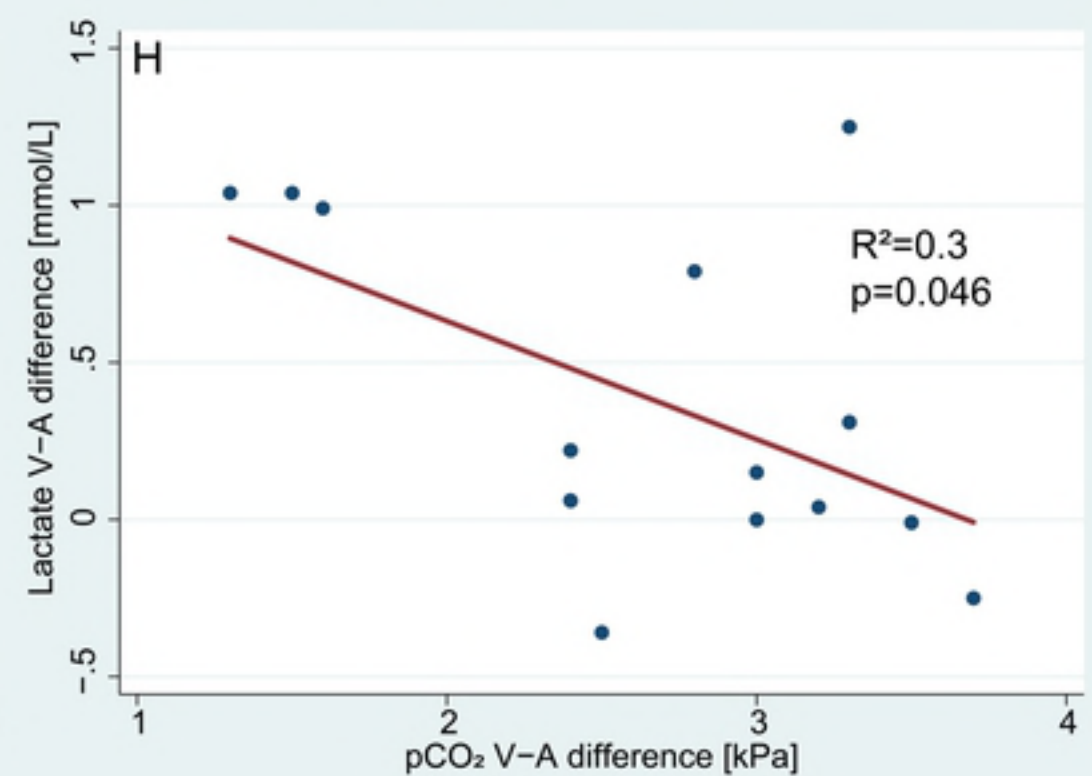

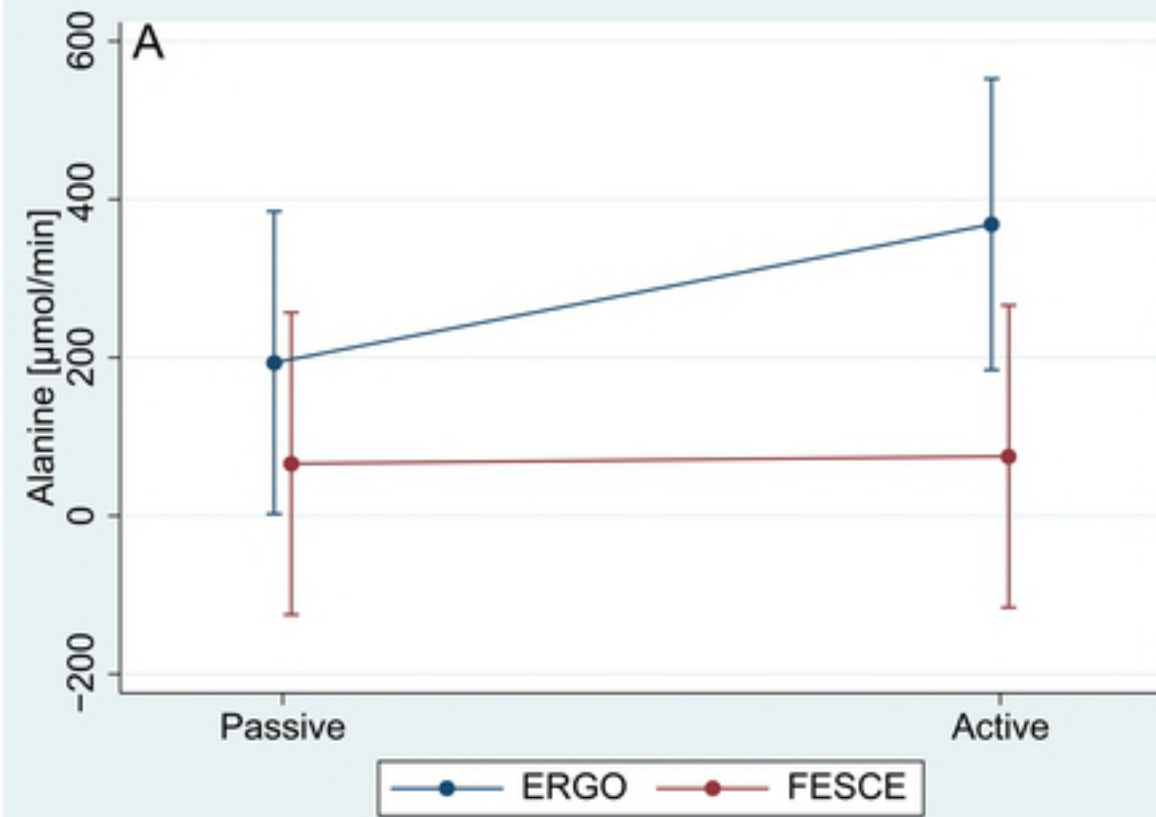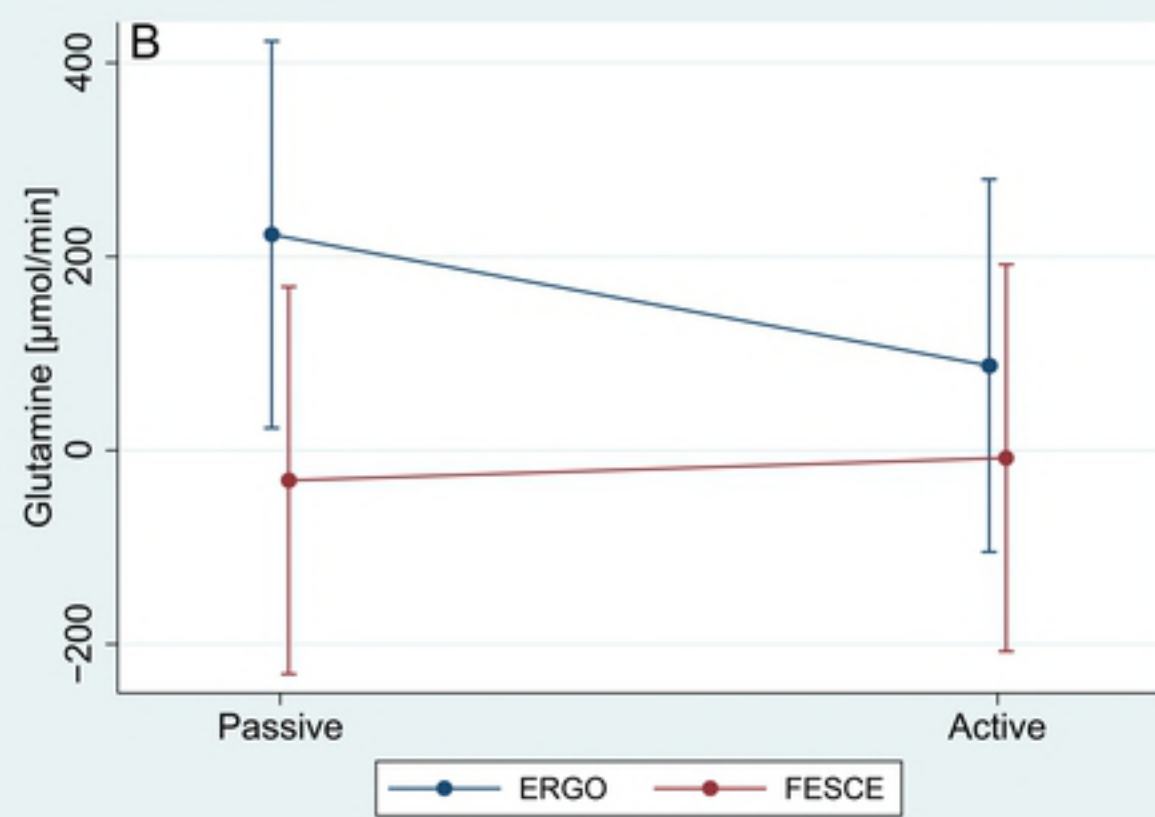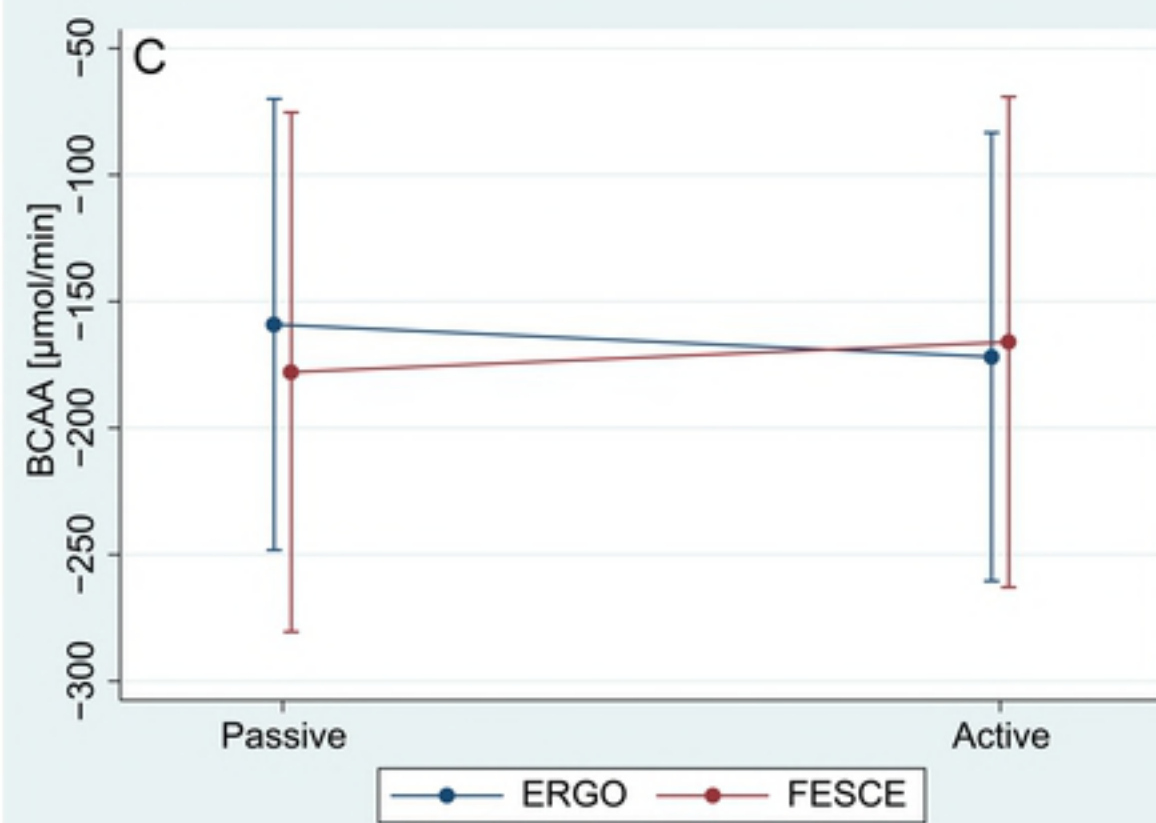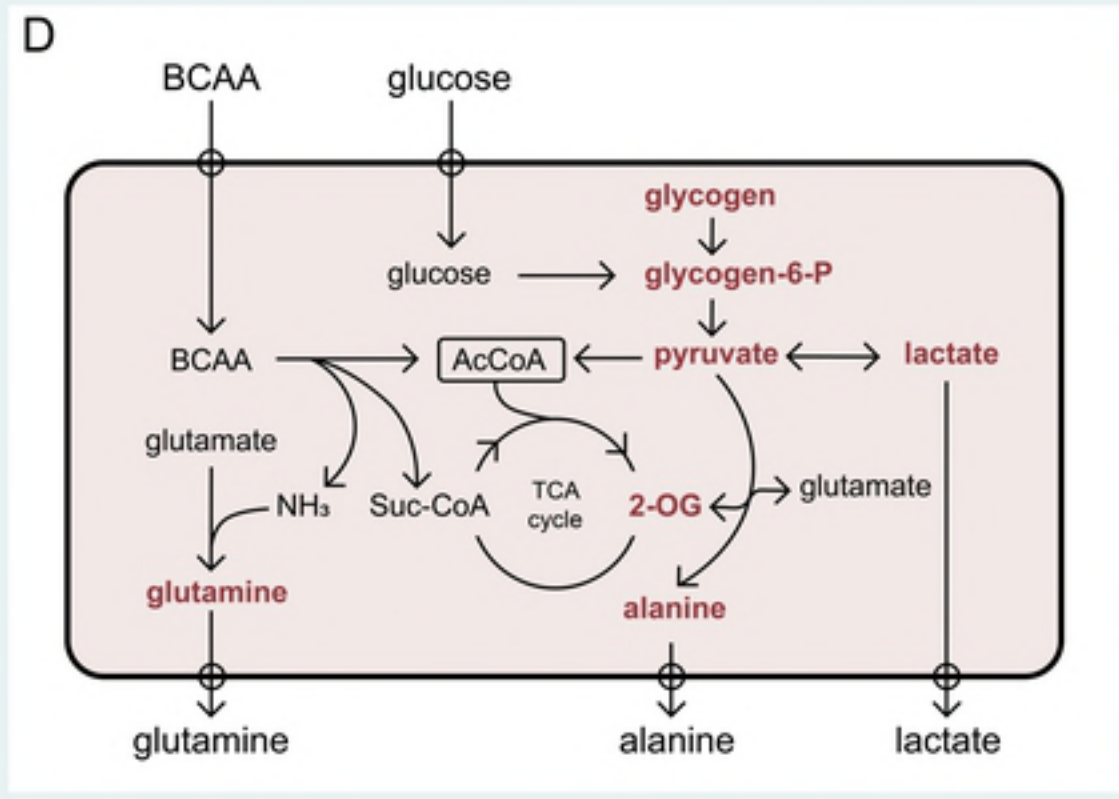

Source: https://www.biorxiv.org/content/10.1101/355321v1.full.pdf
